# Intracardial Cement in Postanesthesia Care Unit

Changlong Qiao, M.D., Meng Lv, M.D., Ph.D., Yuelan Wang, M.D., Ph.D.

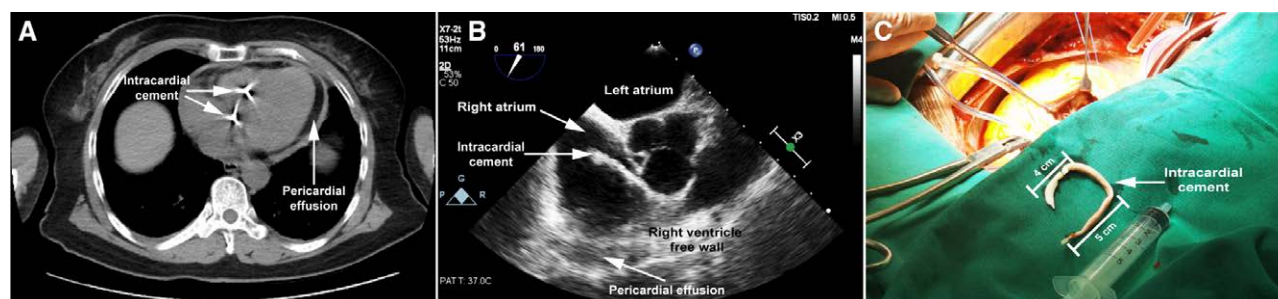

A 59-yr-old female presented with worsening shortness of breath and chest pain in the postanesthesia care unit 2h after vertebroplasty with cementing. Stat chest computed tomography revealed intracardial foreign body and pericardial effusion (panel A). Considering the recent cementing, the foreign body was suspected to be cement. An urgent surgical intervention was prepared. After induction, transesophageal echocardiography showed pericardial effusion and a highly echogenic object floating in the right atrium and right ventricle with one end pointing to the right ventricle free wall (panel B). The chest was opened under cardiopulmonary bypass and transesophageal echocardiography guidance. U-shaped cement with a 5-cm long arm and 4-cm short arm was removed from the right atrium (panel C). The cement was rigid and both ends were sharp. Vertebroplasty with cementing can cause cement embolism,<sup>1</sup> more commonly seen as pulmonary cement embolism. Small emboli may not be clinically significant; however, large emboli could present as rigid and sharp foreign bodies that may perforate the major vessel or heart, resulting in catastrophic events. The early diagnosis may be challenging as the presentation could be nonspecific and occur with delay. The anesthesia care team must be cautious for cement embolism and closely monitor vital signs intraoperatively and postoperatively. Once the diagnosis of cement emboli is made, prompt intervention to locate and remove the cement emboli should be carried out, as the features of its rigidity and sharpness may cause catastrophic events and the urgency of its management should be differentiated from other kinds of emboli.<sup>2,3</sup>

## Acknowledgments

The authors thank Qianjin Liu, M.D., Ph.D. (Department of Anesthesiology, Barnes-Jewish Hospital, Washington

University School of Medicine, St. Louis, Missouri), for his modification and guidance to the manuscript and figures and Changping Gu, M.D., Ph.D. (Department of Anesthesiology and Perioperative Medicine, The First Affiliated Hospital of Shandong First Medical University and Shandong Provincial Qianfoshan Hospital, Shandong Institute of Anesthesia and Respiratory Critical Care Medicine, Jinan, China), for the later contribution of manuscript revision.

## Research Support

This work was funded by the National Natural Science Foundation of China (Beijing, China; grant No. 82070078) and Taishan Scholars (Jinan, China; grant No. ts20190981).

## Competing Interests

The authors declare no competing interests.

## Correspondence

Address correspondence to Dr. Wang: wyldgf@163.com

## References

1. Hatzantonis C, Czyz M, Pyzik R, Boszczyk BM: Intracardiac bone cement embolism as a complication of vertebroplasty: Management strategy. *Eur Spine J* 2017; 26:3199–205
2. Adler AC: Images in anesthesiology: Air embolism during cardiac catheterization and the role for anesthesia use of bedside ultrasound. *ANESTHESIOLOGY* 2017; 127:890
3. Seino Y, Maruyama E, Nomura M, Ozaki M: A floating object in the left atrium. *ANESTHESIOLOGY* 2018; 128:142

Published online first on September 14, 2021. From the Department of Anesthesiology and Perioperative Medicine, The First Affiliated Hospital of Shandong First Medical University and Shandong Provincial Qianfoshan Hospital, Shandong Institute of Anesthesia and Respiratory Critical Care Medicine, Jinan, China.

Copyright © 2021, the American Society of Anesthesiologists. All Rights Reserved. *Anesthesiology* 2021; 135:893. DOI: 10.1097/ALN.0000000000003957
